# Supplementary material for: Improved simulation of isoprene oxidation chemistry with the ECHAM5/MESSy chemistry-climate model: lessons from the GABRIEL airborne field campaign
Source: Copernicus journal article supplement (doi:10.5194/acp-8-4529-2008), 2008-08-05
Supplement: Supplementary file 1 [file acp-8-4529-2008-supplement.pdf]

Manuscript prepared for Atmos. Chem. Phys. Discuss.  
with a modified version of the L<sup>A</sup>T<sub>E</sub>X class copernicus.cls.  
Date: 24 June 2008

# **Improved simulation of isoprene oxidation chemistry with the ECHAM5/MESSy chemistry-climate model: Lessons from the GABRIEL airborne field campaign: Supplementary material**

**T. M. Butler, D. Taraborrelli, C. Brühl, H. Fischer, H. Harder, M. Martinez, J. Williams, M. G. Lawrence, and J. Lelieveld**

Max Planck Institute for Chemistry, Mainz, Germany

Correspondence to: T. M. Butler  
([tmb@mpch-mainz.mpg.de](mailto:tmb@mpch-mainz.mpg.de))



**Fig. 1.** Important terms in the OH budget as simulated by ECHAM5/MESSy (using the MIMvK mechanism), compared with GABRIEL measurements.



**Fig. 2.** Model-measurement comparison for several trace species observed during GABRIEL for the MIMvK model run



**Fig. 3.** Model-measurement comparison for several trace species observed during GABRIEL for the MIM2 model run



**Fig. 4.** Model-measurement comparison for several trace species observed during GABRIEL for the model run performed without isoprene



Fig. 5. Effect of progressively adding more artificial OH to the MIM2 mechanism



**Fig. 6.** Model-measurement comparison for several trace species observed during GABRIEL for the run performed with MIM2 and two artificial OH radicals produced from the reaction of HO<sub>2</sub> with peroxides of isoprene



**Fig. 7.** Model-measurement comparison for several trace species observed during GABRIEL for the run with both artificial OH and a 50% increase in the global isoprene flux



**Fig. 8.** Model-measurement comparison for several trace species observed during GABRIEL for the run with both artificial OH and the reduced rate constant for isoprene + OH
